# Supplementary material for: Comparison of Subjective and Objective Sleep Estimations in Patients with Bipolar Disorder and Healthy Control Subjects
Source: Hindawi journal article supplement (doi:10.1155/2016/4031535), 2016-01-01
Supplement: f1 [file 4031535.f1.pdf]

## Supplement 1:

Online-Diary (translated from German)

|     | <b>Evening</b>                                      | Example   |
|-----|-----------------------------------------------------|-----------|
| 1.  | Mood? <sup>1</sup>                                  | 6         |
| 2.  | Were you tired during the day?                      | 2         |
| 3.  | How many cups of tea/coffee did you consume?        | 5         |
| 4.  | Did you consume alcohol or sedatives?<br>How much?  | 0,5L Bier |
| 5.  | What time did you go to bed and try to sleep?       | 23:10     |
| 6.  | How long were you awake for before you fell asleep? | 10 Min    |
|     | <b>Morning</b>                                      | Beispiel  |
| 7.  | What time did you wake up?                          | 6:10      |
| 8.  | How long did you sleep in total?                    | 7 Std.    |
| 9.  | How often were you awake for?                       | 2x        |
| 10. | Are you feeling refreshed/well rested? <sup>3</sup> | 2         |
| 11. | Mood? <sup>1</sup>                                  | 3         |

<sup>1</sup> (sad=1, normal=5, euphoric=10)

<sup>2</sup> (not at all=1, very tired=6)

<sup>3</sup> (1=fresh and awake, tired/exhausted=6)
